# Supplementary material for: CAG Repeat Not Polyglutamine Length Determines Timing of Huntington’s Disease Onset
Source: PubMed Central journal article supplement (PMC6700281; doi:10.1016/j.cell.2019.06.036), 2019-08-08
Supplement: mmc3.pdf [file mmc3.pdf]

Genetic Modifiers of Huntington's Disease (GeM-HD) Consortium

Jong-Min Lee<sup>1,2#</sup>, Kevin Correia<sup>1</sup>, Jacob Loupe<sup>1,2</sup>, Kyung-Hee Kim<sup>1,2</sup>, Douglas Barker<sup>1</sup>, Eun Pyo Hong<sup>1,2</sup>, Michael J. Chao<sup>1,2</sup>, Jeffrey D. Long<sup>3</sup>, Diane Lucente<sup>1,2</sup>, Jean Paul G. Vonsattel<sup>4</sup>, Ricardo Mouro Pinto<sup>1,2</sup>, Kawther Abu Elneel<sup>1</sup>, Eliana Marisa Ramos<sup>1</sup>, Jayalakshmi Srinidhi Mysore<sup>1</sup>, Tammy Gillis<sup>1</sup>, Vanessa C. Wheeler<sup>1,2,#</sup>, Marcy E. MacDonald<sup>1,2,6,#</sup> and James F. Gusella<sup>1,4,5,6\*,#,%</sup>

<sup>1</sup>Molecular Neurogenetics Unit, Center for Genomic Medicine, Massachusetts General Hospital, Boston MA 02114, USA

<sup>2</sup>Department of Neurology, Harvard Medical School, Boston MA 02115, USA

<sup>3</sup>Department of Biostatistics, College of Public Health, and Department of Psychiatry, Carver College of Medicine, University of Iowa, Iowa City 52242, USA

<sup>4</sup>Department of Pathology and Cell Biology and the Taub Institute for Research on Alzheimer's Disease and the Aging Brain, Columbia University Medical Center, New York, NY 10032, USA

<sup>5</sup>Department of Genetics, Blavatnik Institute, Harvard Medical School, Boston MA 02115, USA

<sup>6</sup>Medical and Population Genetics Program, the Broad Institute of M.I.T. and Harvard, Cambridge MA 02142, USA

Branduff McAllister<sup>7,+</sup>, Thomas Massey<sup>7+</sup>, Christopher Medway<sup>7</sup>, Timothy C. Stone<sup>7</sup>, Lynsey Hall<sup>7</sup>, Lesley Jones<sup>7#&</sup>, Peter Holmans<sup>7#&</sup>

<sup>7</sup>Medical Research Council (MRC) Centre for Neuropsychiatric Genetics and Genomics, Division of Psychological Medicine and Clinical Neurology, School of Medicine, Cardiff University, Cardiff, United Kingdom

Seung Kwak<sup>8#</sup>, Anka G. Ehrhardt<sup>8</sup> and Cristina Sampaio<sup>8</sup>

<sup>8</sup>CHDI Management/CHDI Foundation, Princeton NJ 08540 USA

Marc Ciosi<sup>9</sup>, Alastair Maxwell<sup>9</sup>, Afroditi Chatzi<sup>9</sup> and Darren G. Monckton<sup>9</sup>

<sup>9</sup>Institute of Molecular, Cell and Systems Biology, College of Medical, Veterinary and Life Sciences, University of Glasgow, Glasgow G12 8QQ, U.K

Michael Orth<sup>10,#</sup> and G. Bernhard Landwehrmeyer<sup>10</sup> on behalf of the European Huntington's Disease Network (EHDN) Registry investigators<sup>^</sup>, Jane S. Paulsen<sup>11</sup> on behalf of the Huntington Study Group (HSG) PREDICT-HD investigators<sup>^</sup>, E. Ray Dorsey<sup>12</sup> and Ira Shoulson<sup>12</sup> on behalf of the HSG COHORT, PHAROS and TREND-HD investigators<sup>^</sup>, and Richard H. Myers<sup>13,#</sup> on behalf of the HD-MAPS investigators<sup>^</sup>

<sup>10</sup>Department of Neurology, University of Ulm, Germany

<sup>11</sup>Departments of Psychiatry and Neurology, University of Iowa Roy and Lucille Carver College of Medicine, Iowa City IA 52242, USA

<sup>12</sup>Department of Neurology, University of Rochester Medical Center, Rochester NY 14642, USA

<sup>13</sup>Department of Neurology and Genome Science Institute, Boston University School of Medicine, Boston MA 02118, USA

\*Correspondence: James F. Gusella,

Footnotes:

% Denotes Lead Contact

# Denotes founding GeM-HD investigators

+ equal contributions

& equal contributions

^ The Acknowledgments section indicates links to the Enroll-HD, Registry, PREDICT-HD, COHORT, PHAROS, TREND-HD and HD-MAPS investigators
